# Supplementary material for: Preparation of photoluminescent carbon nitride dots from CCl4 and 1,2-ethylenediamine: a heat-treatment-based strategy
Source: Royal Society of Chemistry journal article supplement (doi:10.1039/c1jm12149a), 2011-01-01
Supplement: c1jm12149a.pdf [file c1jm12149a.pdf]

## Electronic Supplementary Information

### Preparation of photoluminescent carbon nitride dots from CCl<sub>4</sub> and 1,2-ethylenediamine: A heat-treatment-based strategy

Sen Liu,<sup>a</sup> Jingqi Tian,<sup>a,b</sup> Lei Wang,<sup>a</sup> Yonglan Luo,<sup>a</sup> Junfeng Zhai,<sup>a</sup> and Xuping Sun<sup>\*a</sup>

<sup>a</sup> State Key Lab of Electroanalytical Chemistry, Changchun Institute of Applied Chemistry, Chinese Academy of Sciences, Changchun 130022, Jilin, China

<sup>b</sup> Graduate School of the Chinese Academy of Sciences, Beijing 100039, China

\*To whom correspondence should be addressed. Phone/Fax: (+86)-431-85262065.

E-mail: sunxp@ciac.jl.cn

#### Characterizations

UV-vis spectra were obtained on a UV5800 Spectrophotometer. X-ray photoelectron spectroscopy (XPS) analysis was measured on an ESCALAB MK II X-ray photoelectron spectrometer using Mg as the exciting source. FT-IR spectrum was performed on an IFS 66V/S (Bruker) IR spectrometer in the range of 400-4000cm<sup>-1</sup>. Transmission electron microscopy (TEM) measurements were made on a HITACHI H-8100 electron microscopy (Hitachi, Tokyo, Japan) with an accelerating voltage of 200 kV. The sample for TEM characterization was prepared by placing a drop of colloidal solution on carbon-coated copper grid and dried at room temperature. Fluorescent emission spectra were recorded on a RF-5301PC spectrofluorometer (Shimadzu, Japan). Zeta potential measurements were performed

on a Nano-ZS Zetsozer ZEN3600 (Malvern Instruments Ltd., U.K.).

### Quantum Yield Measurements

Quantum yield was measured according to established procedure (Lakowicz, J. R. *Principles of Fluorescence Spectroscopy*, 2<sup>nd</sup> Ed., 1999, Kluwer Academic/Plenum Publishers, New York). The optical densities were measured on UV-vis spectra were obtained on a UV5800 Spectrophotometer. Quinine sulfate in 0.1 M H<sub>2</sub>SO<sub>4</sub> (literature quantum yield 0.54 at 360 nm) was chose as a standard. Absolute values are calculated using the standard reference sample that has a fixed and known fluorescence quantum yield value, according to the following equation:

$$\varphi_x = \varphi_{std} \frac{I_x}{A_x} \frac{A_{std}}{I_{std}} \frac{\eta_x^2}{\eta_{std}^2}$$

Where  $\varphi$  is the quantum yield,  $I$  is the measured integrated emission intensity, and  $A$  is the optical density, and  $\eta$  is the refractive index. The subscript “std” refers to the reference fluorophore of known quantum yield. In order to minimize re-absorption effects absorbencies in the 10 mm fluorescence cuvette were kept under 0.1 at the excitation wavelength (360 nm).

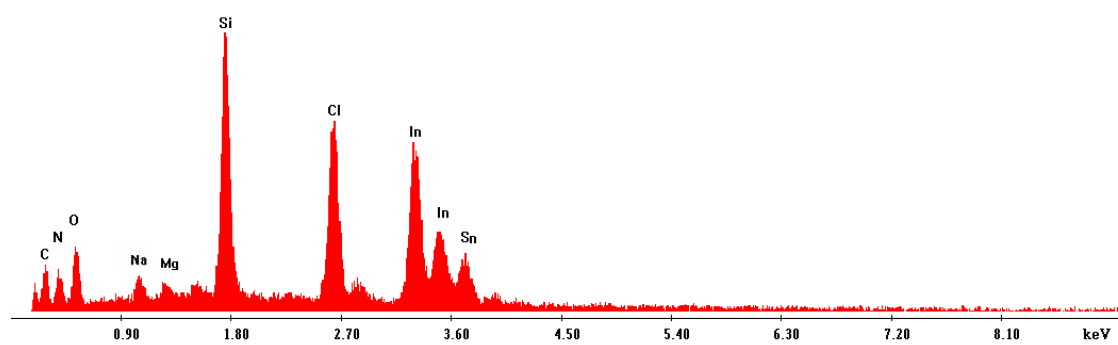

**Fig. S1** The EDS spectrum of products thus formed.

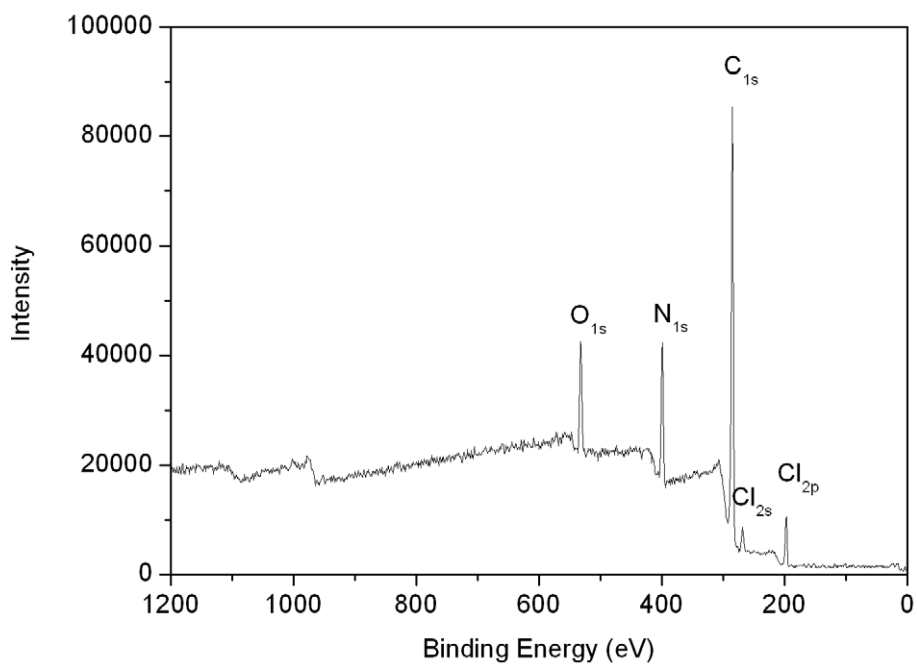

**Fig. S2** XPS spectrum of CNDs-R thus formed.

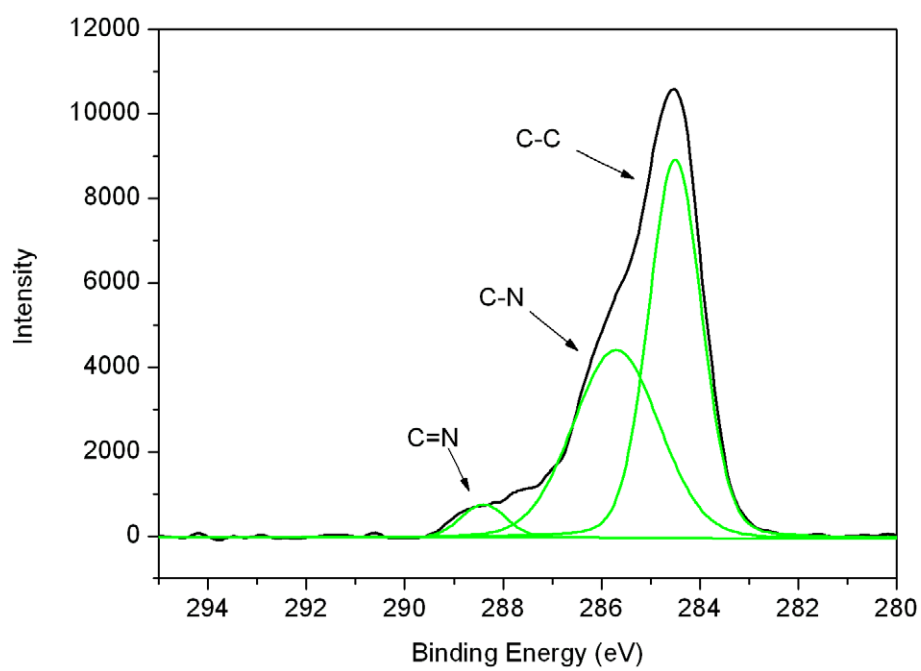

**Fig. S3**  $C_{1s}$  spectrum of CNDs-R thus formed.

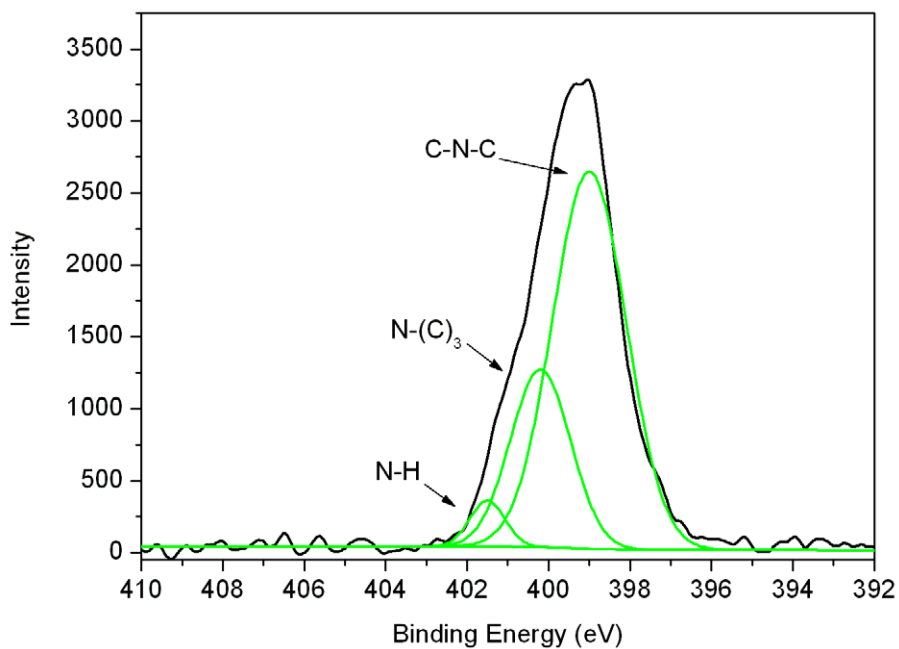

**Fig. S4** N<sub>1s</sub> spectrum of CNDs-R thus formed.

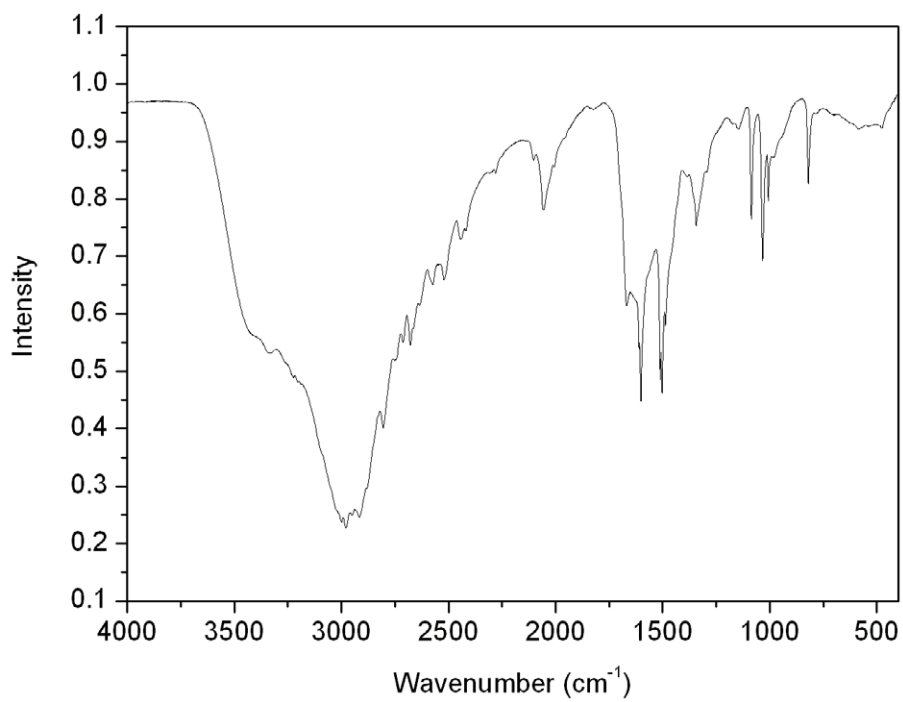

**Fig. S5** The FT-IR spectrum of CNDs-R thus formed.

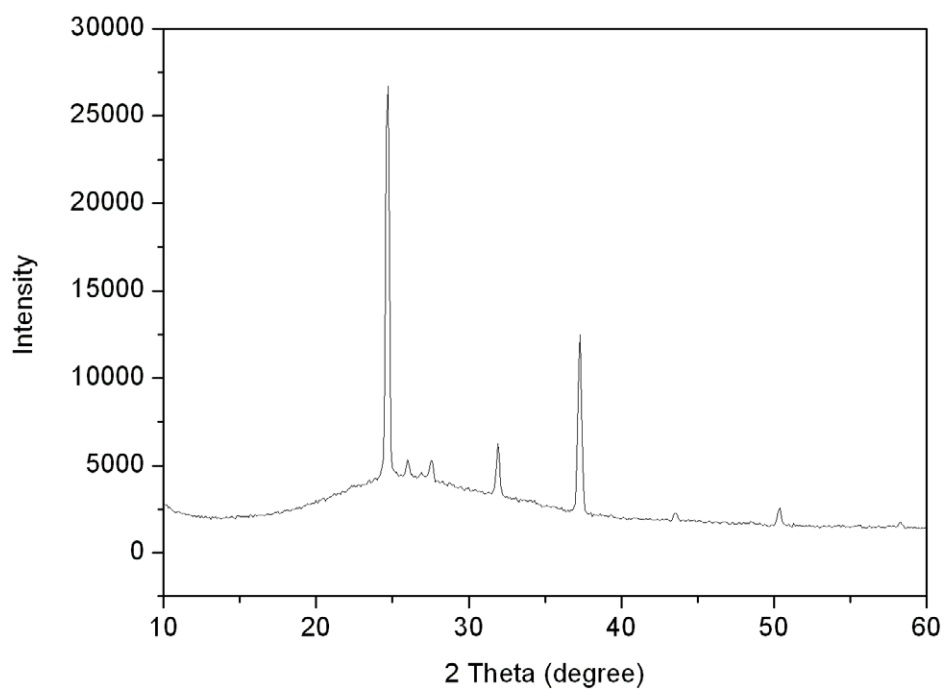

**Fig. S6** The XRD pattern of CNDs-R thus formed.



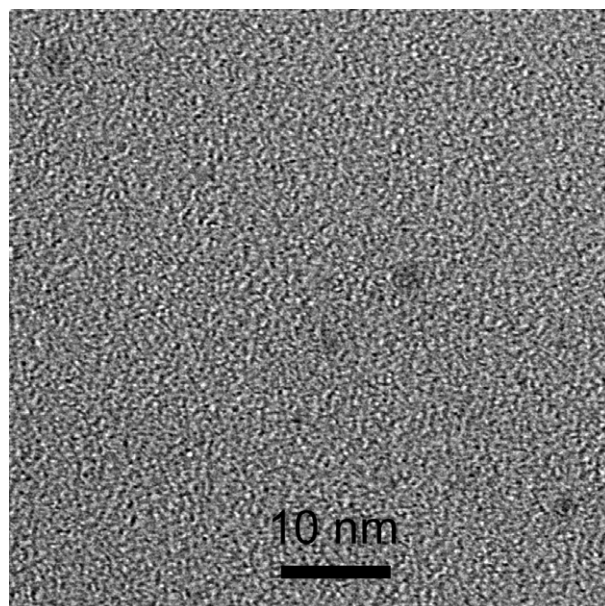

**Fig. S7** The high magnification image of CNDs-R thus formed.

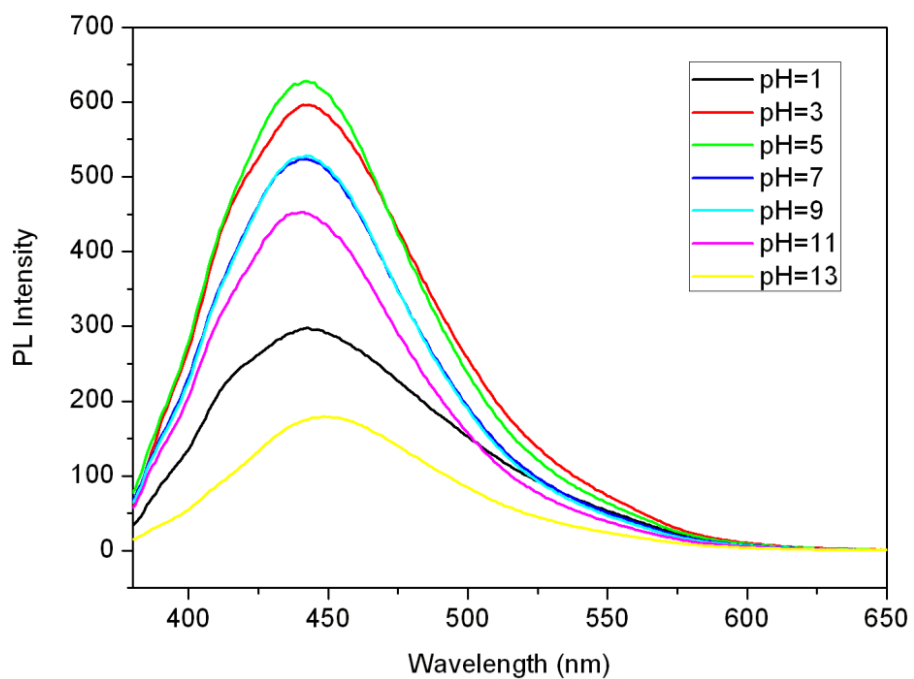

**Fig. S8** The effect of the solution pH value on CNDs-R fluorescence.

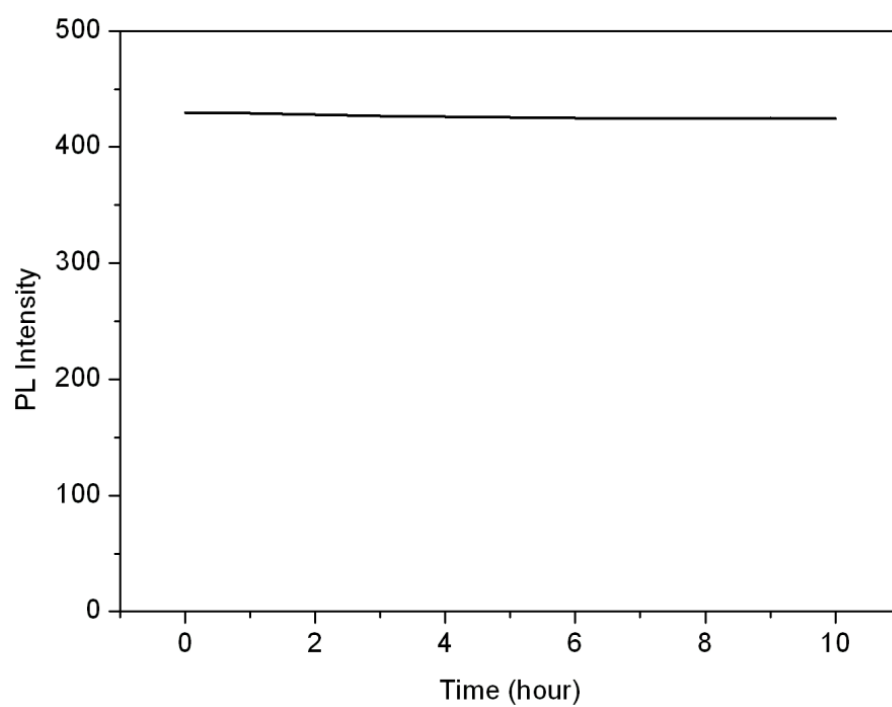

**Fig. S9** Emission intensity of CNDs-R during continuous excitation at 365 nm.
